# Supplementary material for: PnTgs1-like expression during reproductive development supports a role for RNA methyltransferases in the aposporous pathway
Source: PubMed Central journal article supplement (PMC4243328; doi:10.1186/s12870-014-0297-0), 2014-11-18

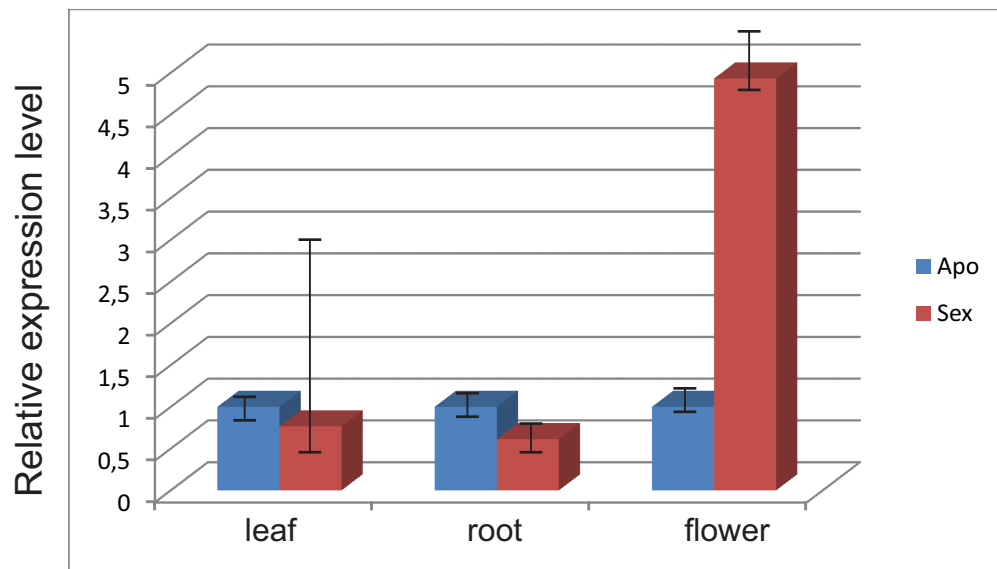

Supplement: 12870_2014_297_MOESM1_ESM.pdf [file 12870_2014_297_MOESM1_ESM.pdf]
